# Supplementary material
Source: PubMed Central journal article supplement (PMC10958540)

Figure 1 – figure supplement 1: Sequencing. (A) Sanger sequencing of pMRLB.7 with the ESAT-6 open reading frame (ORF) highlighted grey. (B) Sanger sequencing of pMRLB.46 with the CFP-10 ORF highlighted grey.

Figure 1 – figure supplement 2: Whole protein mass spectrometry (MS) of recombinant ESAT-6 and CFP-10. (A) Deconvoluted mass spectrum of recombinant ESAT-6 MS run. (B) Deconvoluted mass spectrum of recombinant CFP-10 MS run. (C) Computed mass of each protein compared with the measured masses. Fractional abundance combined the main peak with the harmonic artifact at twice the mass and gives an approximate relative proportion of each molecule in the sample. ESAT-6 is approximately 38% demethionylated while CFP-10 is fully demethionylated.

Figure 1 – source data 1: SDS-PAGE and Western blot. (A) Uncropped SDS-PAGE gel showing recombinant ESAT-6 and CFP-10 next to a BLUEstain 2 (Gold Bio) protein ladder and stained with Blazin' Blue (Goldbio) protein gel stain. (B) Uncropped western blot showing recombinant ESAT-6 and CFP-10 using a His-tag specific antibody.

Figure 2 – figure supplement 1: Hemolysis by recombinant ESAT-6. (A) Sheep red blood cell hemolysis assay carried out with purified ESAT-6 in citrate buffer at various pH values. Percent hemolysis was calculated by subtracting buffer background and dividing by Triton-X100 detergent lysed samples.

Figure 2 – source data 1: Native PAGE. (A) Native PAGE gel showing pure ESAT-6 on the left, pure CFP-10 on the right, and mixtures of both in the indicated ratios. The gel was stained with Blazin' Blue (Goldbio) protein gel stain.

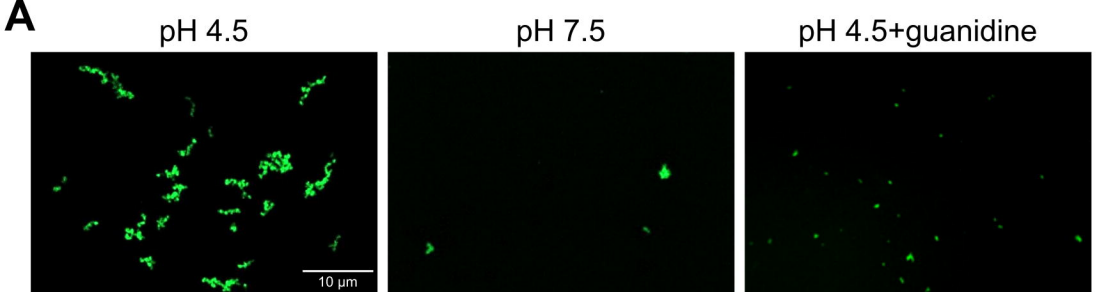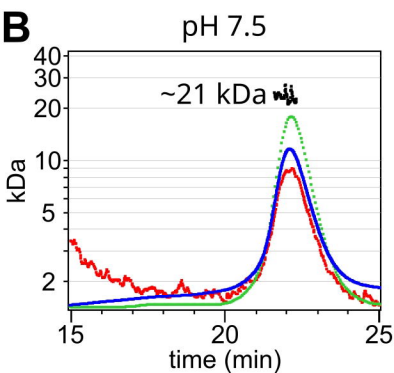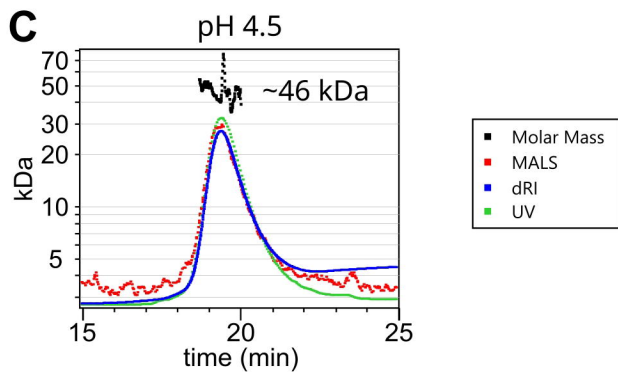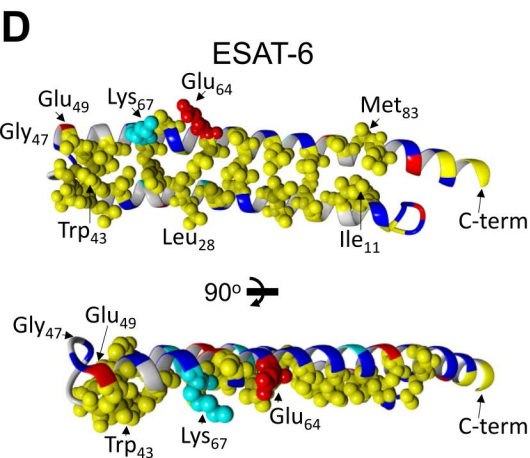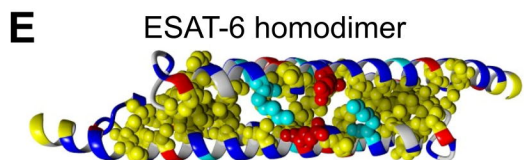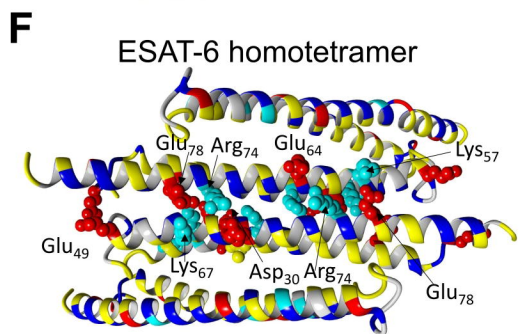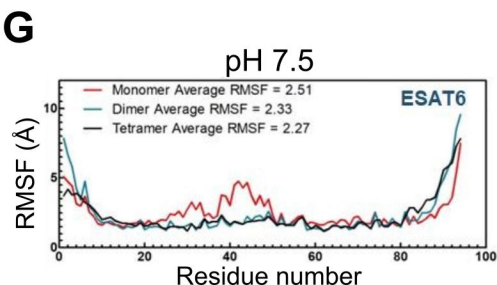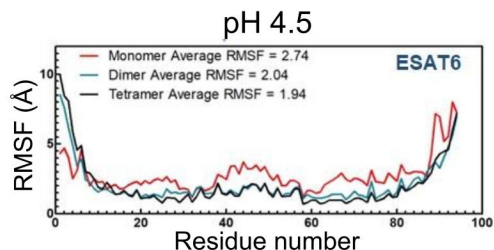

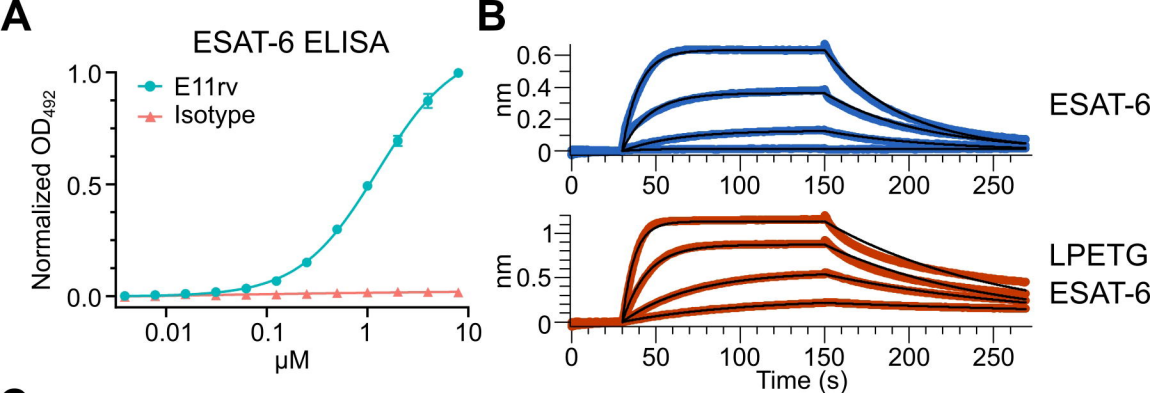

**C**

| Attached | Soluble      | pH  | $K_D$ (nM) | $k_{ON}$ ( $M^{-1}s^{-1}$ ) | $k_{OFF}$ ( $s^{-1}$ ) |
|----------|--------------|-----|------------|-----------------------------|------------------------|
| E11rv    | ESAT-6       | 7.5 | 331        | $5.5 \times 10^4$           | $1.8 \times 10^{-2}$   |
| E11rv    | ESAT-6 LPETG | 7.5 | 376        | $1.9 \times 10^4$           | $7.0 \times 10^{-3}$   |

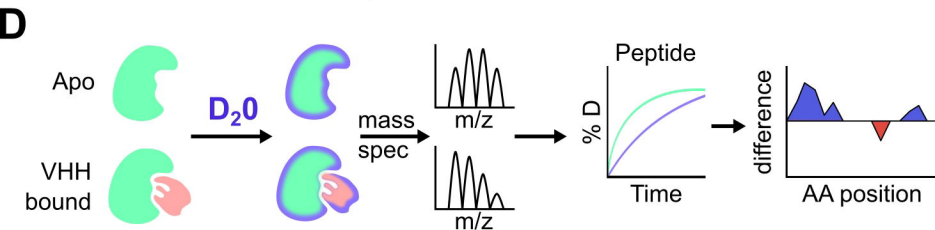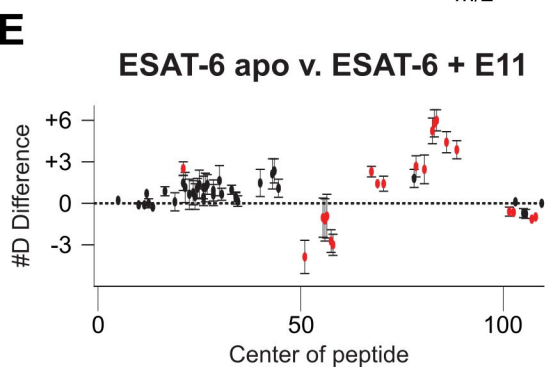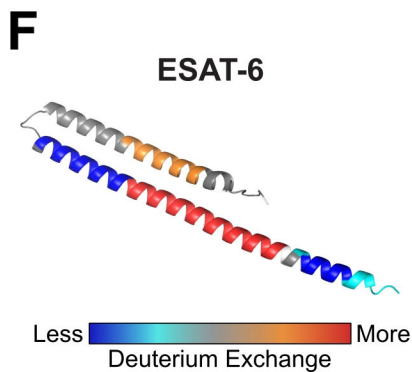

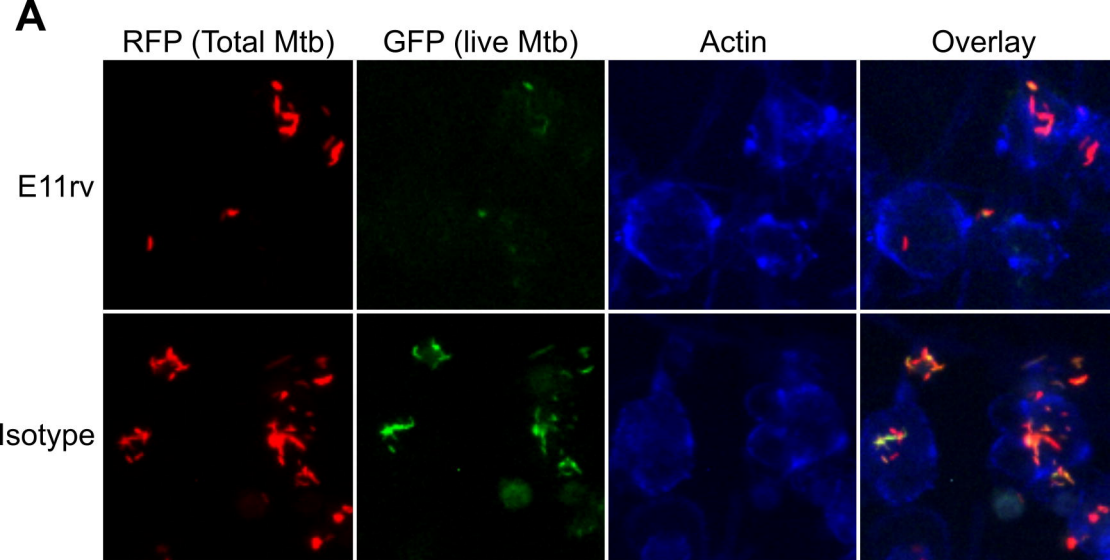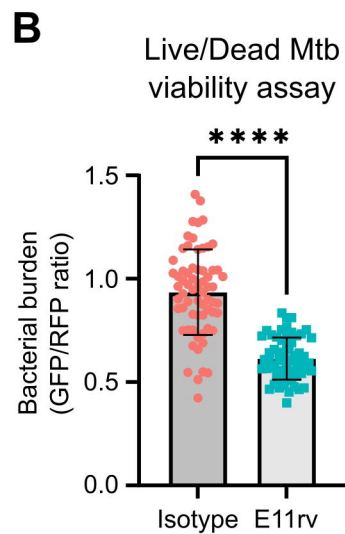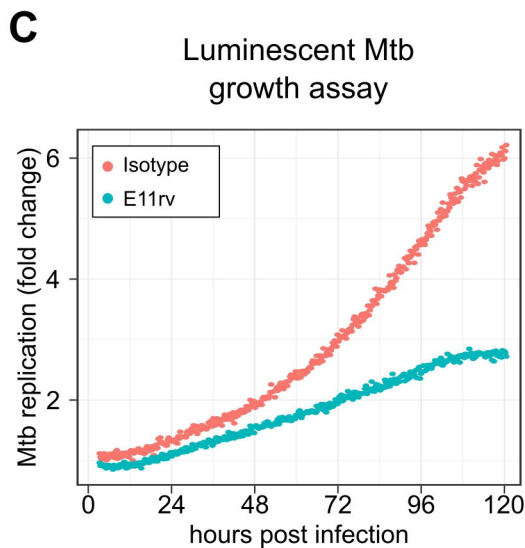

Supplement: NIHPP2023.08.16.553641v3-supplement-3.pdf [file NIHPP2023.08.16.553641v3-supplement-3.pdf]
